# Supplementary material
Source: Springer Nature journal article supplement (https://www.springermedizin.de/resource/supplementary/12943_2005_130_MOESM11_ESM.pdf/9553514)
Supplement: MOESM11 [file 9553514]

**SB203580**

|   |   |   |   |   |   |   |       |
|---|---|---|---|---|---|---|-------|
| - | - | + | + | - | + | + | U0126 |
| - | + | - | + | - | + | - | TPA   |

**12h****Myogenin**  
 **$\alpha$ -tubulin****2d****Myogenin**  
**MyoD**  
 **$\alpha$ -tubulin****4d****Myogenin**  
**MyoD**  
 **$\alpha$ -tubulin****2d****MHC****4d**
